# Supplementary material for: Robust and Elastic Lunar and Martian Structures from 3D-Printed Regolith Inks
Source: PubMed Central journal article supplement (PMC5357966; doi:10.1038/srep44931), 2017-03-20
Supplement: srep44931-s1.pdf [file srep44931-s1.pdf]

## Robust and Elastic Lunar and Martian Structures from 3D-Printed Regolith Inks

Adam E. Jakus<sup>1,4</sup>, Katie D. Koube<sup>1,4</sup>, Nicholas R. Geisendorfer<sup>1,4</sup>, and Ramille N. Shah<sup>1,2,3,4\*</sup>

<sup>1</sup>Department of Materials Science and Engineering, McCormick School of Engineering, Northwestern University

<sup>2</sup>Department of Biomedical Engineering, McCormick School of Engineering, Northwestern University

<sup>3</sup>Division of Organ Transplantation, Comprehensive Transplant Center, Department of Surgery, Feinberg School of Medicine, Northwestern University

<sup>4</sup>Simpson Querrey Institute for BioNanotechnology, Northwestern University

Dr. Adam E. Jakus, PhD  
303 E Superior St.  
11<sup>th</sup> Floor, SQI  
Chicago, IL 60611 USA

Katie D. Koube  
303 E Superior St.  
11<sup>th</sup> Floor, SQI  
Chicago, IL 60611 USA

Nicholas R. Geisendorfer  
303 E. Superior St.  
11<sup>th</sup> Floor, SQI  
Chicago, IL 60611 USA

\*Prof. Ramille N. Shah, PhD  
303 E. Superior St.  
11<sup>th</sup> Floor, SQI  
Chicago, IL 60611 USA  
E-mail: ramille-shah@northwestern.edu

### **Supplementary Materials and Methods**

Additional LRS and MRS structures, such as wrenches, building blocks, etc. were produced from open-source .STL geometries (thingiverse.com) using 330-1200  $\mu\text{m}$  nozzles and a range of printing speeds and extrusion pressures. Linear deposition rates for LRS inks were measured as a function of nozzle diameter (330  $\mu\text{m}$ , 410  $\mu\text{m}$ , 510  $\mu\text{m}$ , 610  $\mu\text{m}$ , 1360  $\mu\text{m}$ , 2900  $\mu\text{m}$ ; Nordson EFD). The 2900  $\mu\text{m}$  diameter nozzle was adapted from a 1360  $\mu\text{m}$  conical nozzle by cutting the nozzle tip, resulting in a 2900  $\mu\text{m}$  opening. Rates were also measured as a function of applied extrusion pressures. For a given nozzle diameter and extrusion pressure, pressure was applied via the 3D BioPlotter for exactly five seconds. The lengths of the resulting extruded fibers were measured and normalized to time. Volumetric deposition rates were calculated from linear deposition rates, taking into account the cross-sectional areas and total volume of extruded fibers. A power-series fit ( $R=0.98$ ) was applied to the experimental volumetric deposition-rate data to extrapolate possible volumetric deposition rates for larger diameter nozzles.

### **Supplementary Tables**

**Table 1.** Nominal compositions (wt. %) of LRS (JSC-1A) and MRS (JSC MARS-1A) regolith powders as reported by corresponding materials data sheets (Orbitec LLC).

|             | SiO <sub>2</sub> | Al <sub>2</sub> O <sub>3</sub> | Fe <sub>2</sub> O <sub>3</sub> | FeO  | TiO <sub>2</sub> | CaO | Na <sub>2</sub> O |
|-------------|------------------|--------------------------------|--------------------------------|------|------------------|-----|-------------------|
| JSC-1A      | 46               | 15.75                          | 12.2                           | 8.17 | 1.7              | 9.9 | 2.8               |
| JSC MARS-1A | 40               | 22                             | 11                             | 3    | 3.5              | 5.5 | 2                 |

## Supplementary Figures

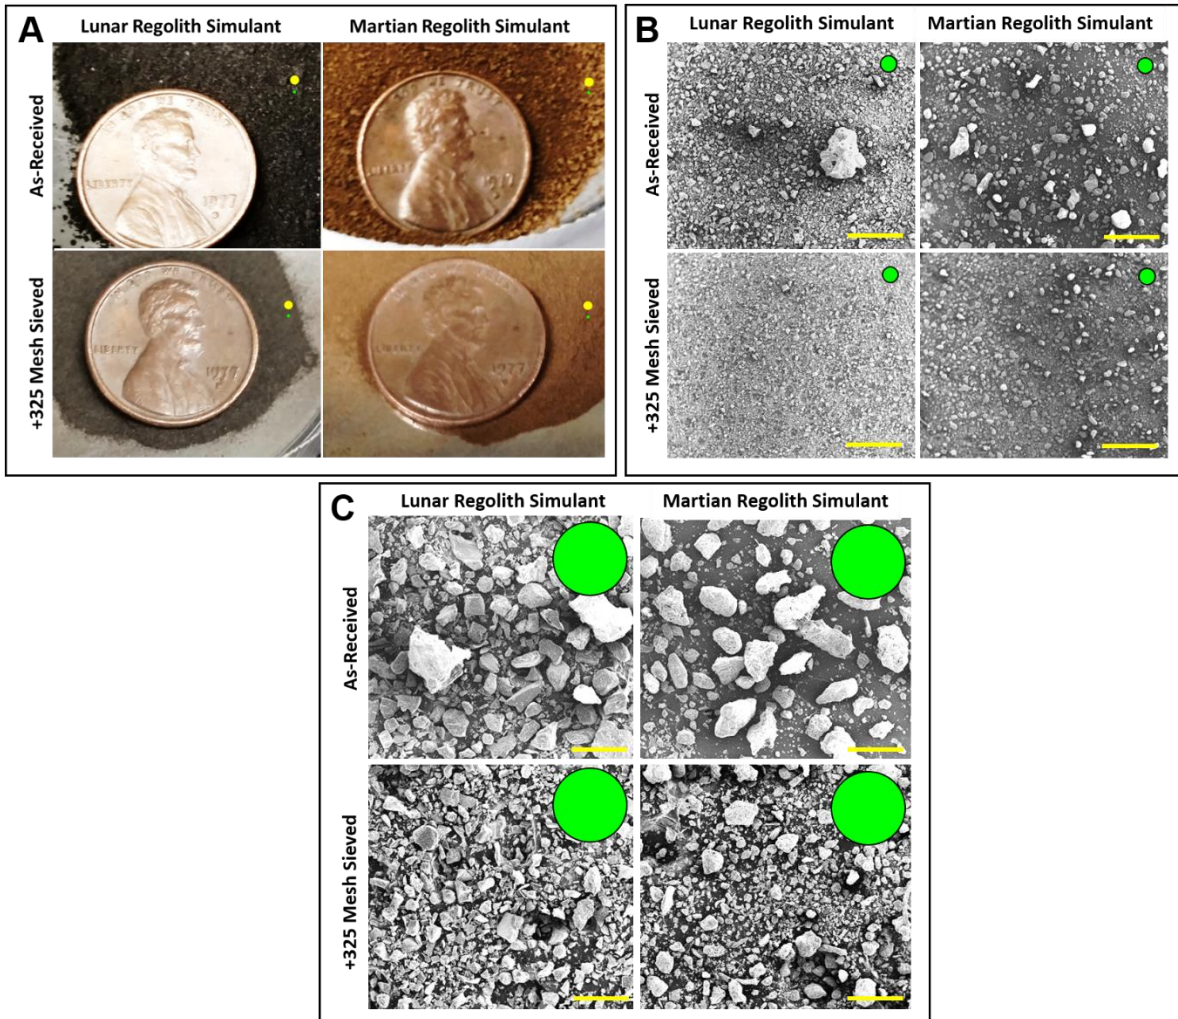

**Supplementary Figure 1.** A) Photographs of LRS and MRS powders, as received and after undergoing +325 mesh sieving. United States penny included for reference. Yellow and green dots represent 1 mm and 330  $\mu\text{m}$ , respectively. 330  $\mu\text{m}$  was the finest nozzle diameter found to be able to effectively extrude LRS and MRS inks derived from sieved powders without frequent clogging events. B) Scanning electron micrographs of LRS and MRS powders, as received and after undergoing +325 mesh sieving. Scale bars are 1 mm, and green dot is 330  $\mu\text{m}$  in diameter. C) Additional scanning electron micrographs of LRS and MRS powders before and after sieving. Scale bars are 250  $\mu\text{m}$  and green dot represents 330  $\mu\text{m}$  in diameter.

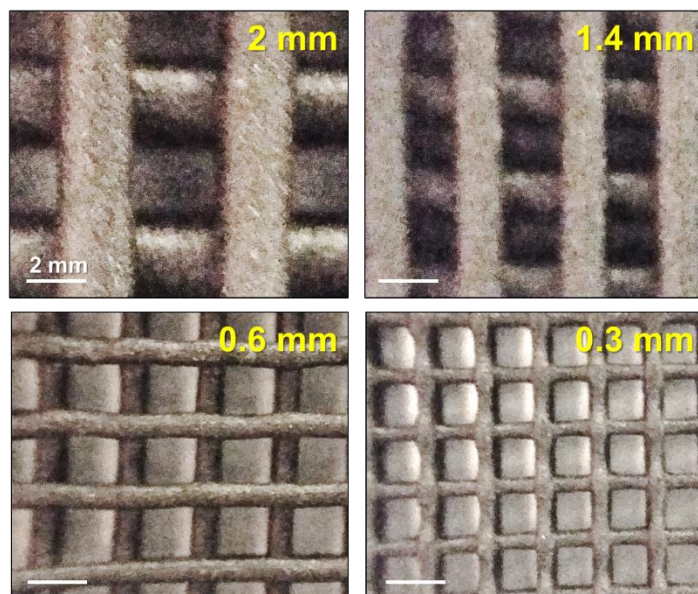

**Supplementary Figure 2.** Top-down view of LRS cylinders 3D-printed using indicated nozzle diameters. All photographs portrayed at the same scale.

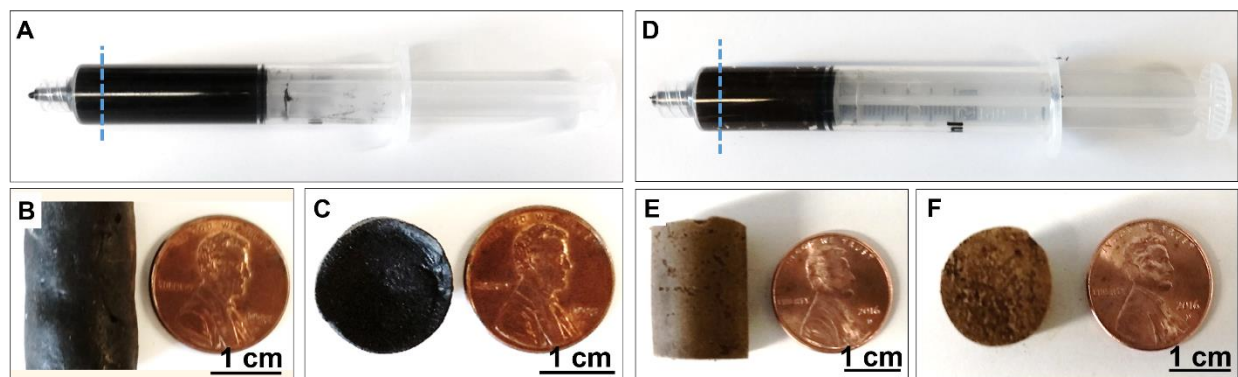

**Supplementary Figure 3.** A) Photograph of standard syringe loaded with LRS ink. Blue-dashed line indicated point at which the syringe was cut to result in a 1.4 cm-diameter orifice, from which the LRS material was extruded by hand. B,C) Photographs of the length and cross-section of the solid, 1.4 cm-diameter “fiber” extruded from the syringe in B). A US penny is also shown for purposes of scale. D-F) Photographs of MRS ink before and after extrusion from a 1.4 cm-diameter syringe; analogous to the LRS shown in A-C.

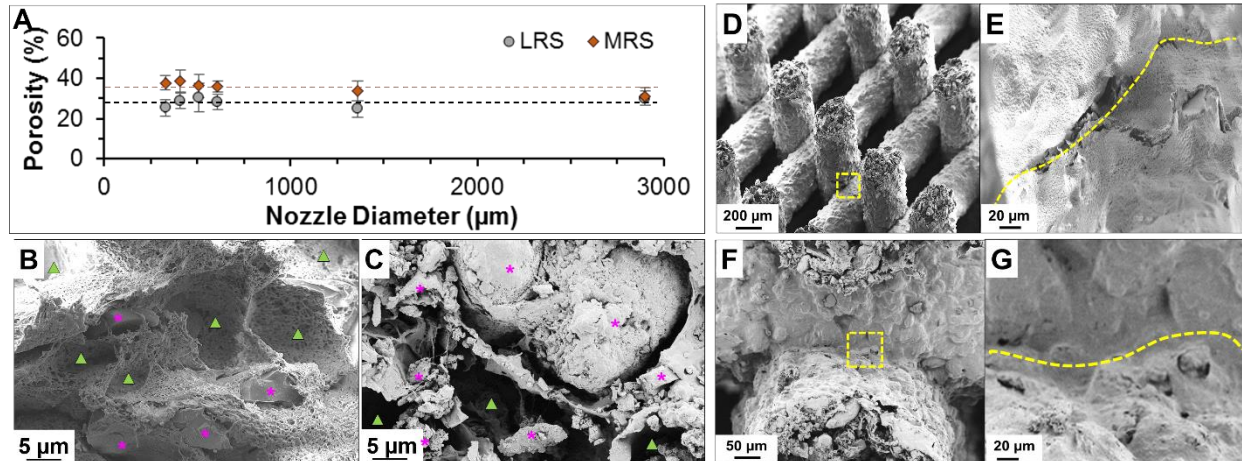

**Supplementary Figure 4.** A) Extruded LRS and MRS fiber porosity as a function of nozzle diameter. Dotted lines represent aggregated averages for all measured LRS or MRS samples. B,C) SEM micrographs further illustrating the interior microstructure of extruded LRS and MRS, respectively. “\*” indicate individual LRS or MRS particles; “▲” indicates voids from which LRS or MRS particles were located prior to sample sectioning for imaging and the particles falling out. The PLGA network can be seen throughout both materials. D-G) SEM micrographs of the cross-section of 3D-printed LRS (D,F) and MRS (E,G) structures, highlighting interlayer bonding. Due to the near seamless nature of the inter-layer material, a yellow-dashed line (E,G) is provided to further define the boundary between two adjacent layers (Yellow boxes in D,F)

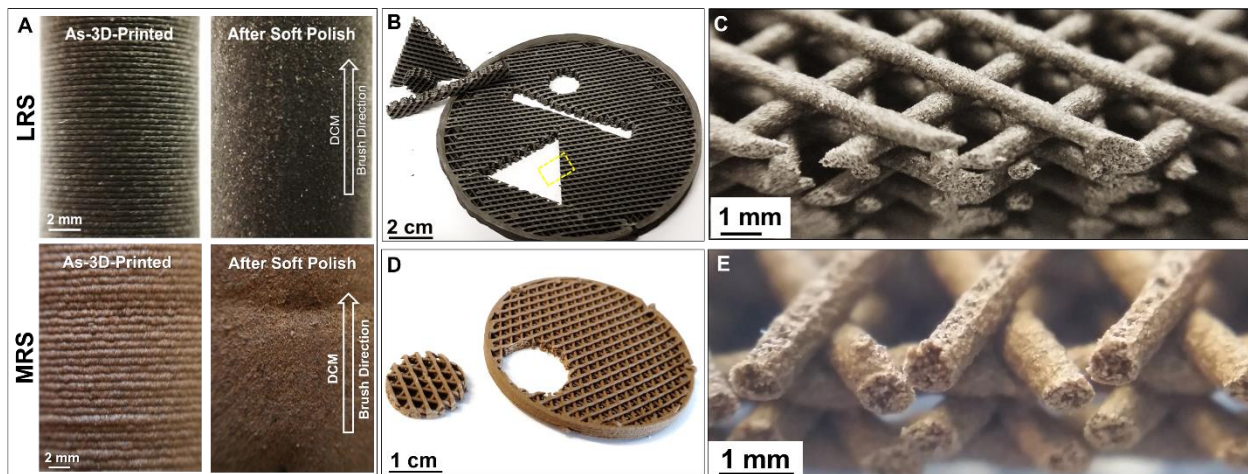

**Supplementary Figure 5.** A) Close-Up photographs of the external diameter of as-printed (left) LRS (top) and MRS (bottom) cylinders created using 400 and a 600  $\mu\text{m}$ -diameter nozzles, respectively, illustrating innate surface roughness of 3D-printed objects. On right, photographs of the exterior of the after soft-polishing using DCM, which removes the ridges that previously defined each 3D-printed layer. B) Photograph of large-diameter LRS cylinder from which several geometries have been cut using a cylindrical punch (cylinder), stamp (tensile “dog bone”), and razor blade (triangle). C) Photograph of the razor-blade cut cross-section (yellow-dashed box in C), highlighting lack of plastic deformation in LRS material near the sectioned interface. D) Photograph of 4 cm diameter MRS cylinder, from which a 1 cm-diameter was punched. E) Close-up photograph of cut MRS contour.

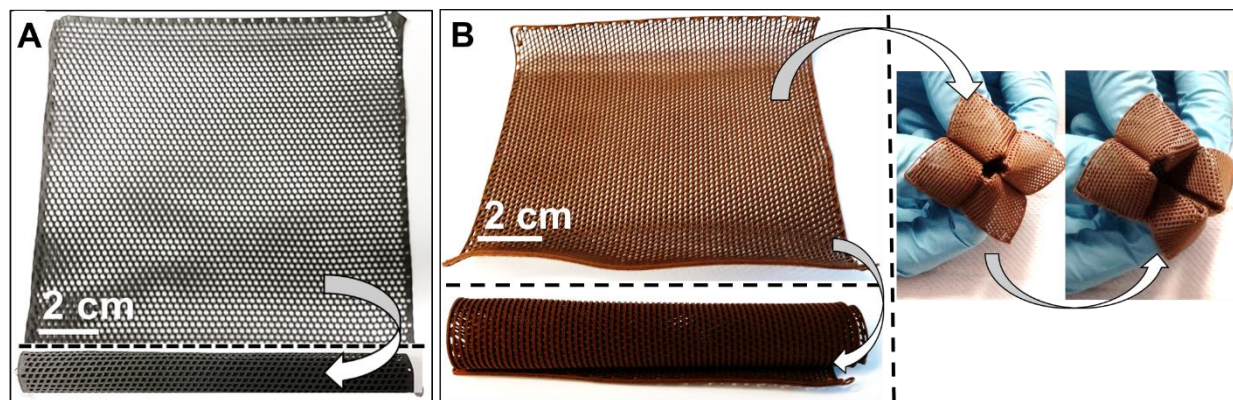

**Supplementary Figure 6.** **A)** Photographs of 12x12 cm, three-layer 3D-printed LRS sheet before and after rolling, illustrating flexibility of the as-printed LRS material. **B)** Photograph of 12x12 cm, three-layer 3D-printed MRS sheet before and after rolling and folding.

### **Supplementary Videos**

**Supplementary Video 1 – Real Time LRS 3D-Printing:** Video illustrating several examples of objects being 3D-printed at rapid speeds from LRS inks. Note rapid drying and fusion of adjacent layers upon material deposition.

**Supplementary Video 2. Real Time MRS 3D-Printing:** Video illustrating several examples of objects being 3D-printed at rapid speeds from MRS inks. Note similarities to LRS 3D-printing (Supplementary Video 1) and rapid drying and fusion of adjacent layers upon material deposition.

**Supplementary Video 3. Real Time 3D-Printing of MRS Sheet and Immediate Post-Printing Handling.** Video illustrating the fabrication of a three-layer, 12x12 cm MRS sheet. Immediately after being 3D-printed, it can be removed from the printing platform and handled. Additionally, the video illustrates the flexibility of the sheet.
